# Supplementary material for: The Premenopausal Breast Cancer Collaboration: A Pooling Project of Studies Participating in the National Cancer Institute Cohort Consortium
Source: Oxford University Press journal article supplement (doi:10.1158/1055-9965.epi-17-0246), 2017-06-09
Supplement: 10559965epi170246-sup-179762_2_unknown_upload_4033066_2psrky.docx [file 10559965epi170246-sup-179762_2_unknown_upload_4033066_2psrky.docx]

Nichols et al. The Premenopausal Breast Cancer Collaboration: A pooling project of studies participating in the National Cancer Institute Cohort Consortium.

**Supplementary table 1: Overview of the number of cohort studies providing information on each type of risk factor in the pooled data set**

| **Data request section** | **Total number of cohorts providing information** | **Number of rounds with information** | |
| --- | --- | --- | --- |
| **One round** | **More than 1 round** |
| Follow-up information | 20 | 20 | 0 |
| Demographics | 20 | 20 | 0 |
| Breast cancer outcome information | 20 | 20 | 0 |
| Physical activity in childhood and young adulthood | 8 | 8 | 0 |
| Total current physical activity | 9 | 7 | 2 |
| Occupational physical activity | 4 | 2 | 2 |
| Non-occupational physical activity | 10 | 5 | 5 |
| Body size in childhood and young adulthood | 16 | 16 | 0 |
| Current body size | 20 | 3 | 17 |
| Pregnancy information | 20 | 6 | 14 |
| Breastfeeding information | 15 | 5 | 10 |
| Medication during/after pregnancy | 6 | 3 | 3 |
| Pregnancy complications | 5 | 1 | 4 |
| Pregnancy weight | 1 | 1 | 0 |
| Infertility | 10 | 4 | 6 |
| Information about subject's own birth | 11 | 11 | 0 |
| Menstrual cycle information | 20 | 15 | 5 |
| Menopause | 20 | 4 | 16 |
| Alcohol consumption information | 20 | 7 | 13 |
| Cigarette smoking information | 20 | 17 | 3 |
| Disease history information | 18 | 10 | 8 |
| Family history of breast cancer | 18 | 8 | 10 |
| History of mammographic screening | 15 | 8 | 7 |
| Exogenous hormone use | 20 | 5 | 15 |
|  |  |  |  |
| Total number of cohorts | 20 |  |  |
